# Supplementary material
Source: ML conference proceedings conference paper supplement (https://openaccess.thecvf.com/content/CVPR2022/html/Lin_SAR-Net_Shape_Alignment_CVPR_2022_paper.html)
Supplement: Supplementary file 2 [file Lin_SAR-Net_Shape_Alignment_CVPR_2022_supplemental.zip]

Archive with 4 entries (3 files):
- 04919-supp/
- 04919-supp/04919-supp-video.mp4
- 04919-supp/04919-supp.pdf
- 04919-supp/readme.txt
