# Supplementary material
Source: ML conference proceedings conference paper supplement (https://openaccess.thecvf.com/content/CVPR2022/html/Lin_SAR-Net_Shape_Alignment_CVPR_2022_paper.html)
Supplement: Supplementary file 2 [file Lin_SAR-Net_Shape_Alignment_CVPR_2022_supplemental.zip › 04919-supp/readme.txt]

################
     Video
################
The video is in mp4 format, which can be opened by most of the video players.

The video introduces real-world scenes test of our COPSE model, visualized intermediate results and the deployment of our SAR-Net in a physical robot for executing the human-robot interaction tasks. 
